# Supplementary material for: Specific DNA sequences allosterically enhance protein–protein interaction in a transcription factor through modulation of protein dynamics: implications for specificity of gene regulation
Source: Royal Society of Chemistry journal article supplement (doi:10.1039/c7cp01193h), 2017-01-01
Supplement: c7cp01193h1.pdf [file c7cp01193h1.pdf]

## Supporting Materials

### **Specific DNA Sequences Allosterically Enhance Protein-Protein Interaction in a Transcription Factor through Modulation of Protein Dynamics: Implications for Specificity of Gene Regulation**

**Abhishek Mazumder<sup>‡</sup>, Subrata Batabyal<sup>§</sup>, Manas Mondal<sup>¶</sup>, Tanumoy Mondol<sup>§</sup>, Susobhan Choudhury<sup>§</sup>, Raka Ghosh<sup>‡</sup>, Tanaya Chatterjee<sup>±</sup>, Dhananjay Bhattacharyya<sup>¶</sup>, Samir Kumar Pal<sup>§</sup>, and Siddhartha Roy<sup>±\*</sup>**

Figure S1. Change in configurational entropy of protein residues of individual subunits of  $\lambda$ -CI due to presence of operator DNA considering all non-hydrogen atoms of the protein residues. (simulation corresponding to ff14SB force field)

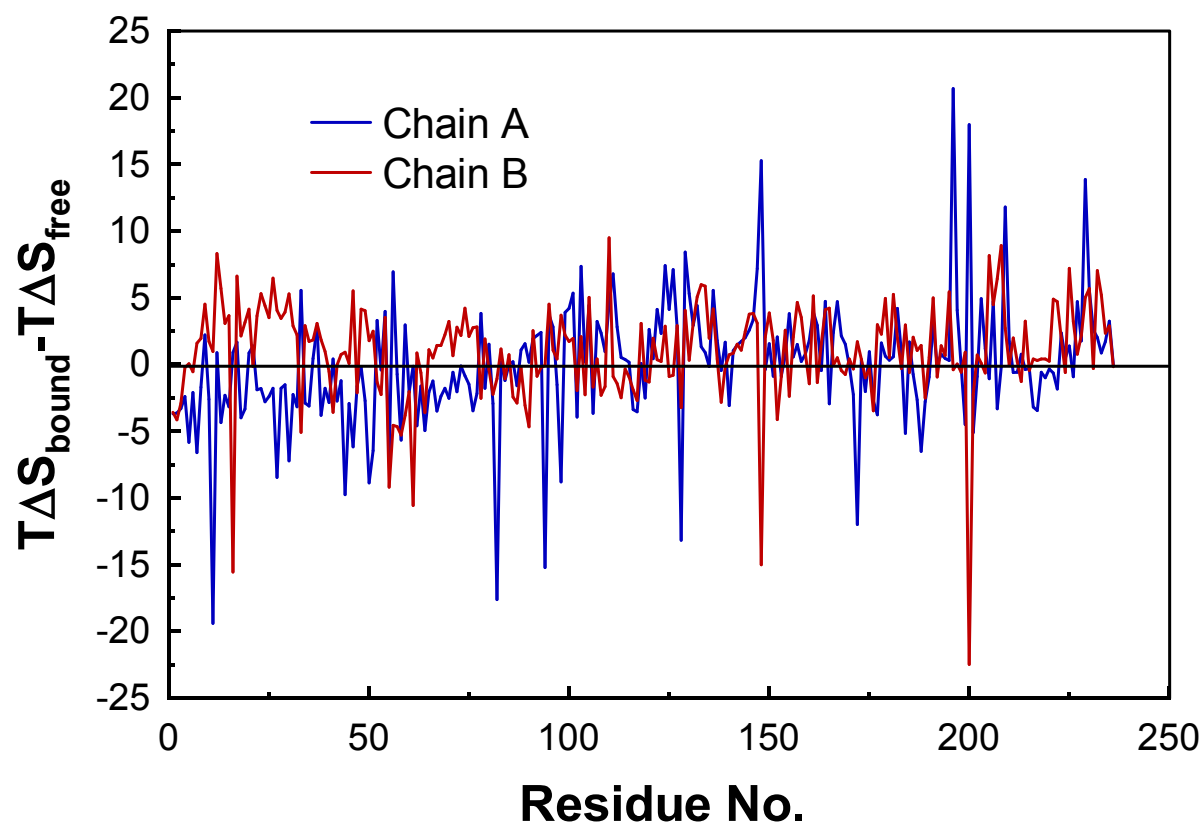

Figure S2. Change in conformational entropy of protein residues of individual subunits of  $\lambda$ -CI due to presence of operator DNA, studied from the distribution of side chain dihedral angle  $\chi_1$  (simulation corresponding to ff14SB force field).

### Entropy based on Chi1 amberff

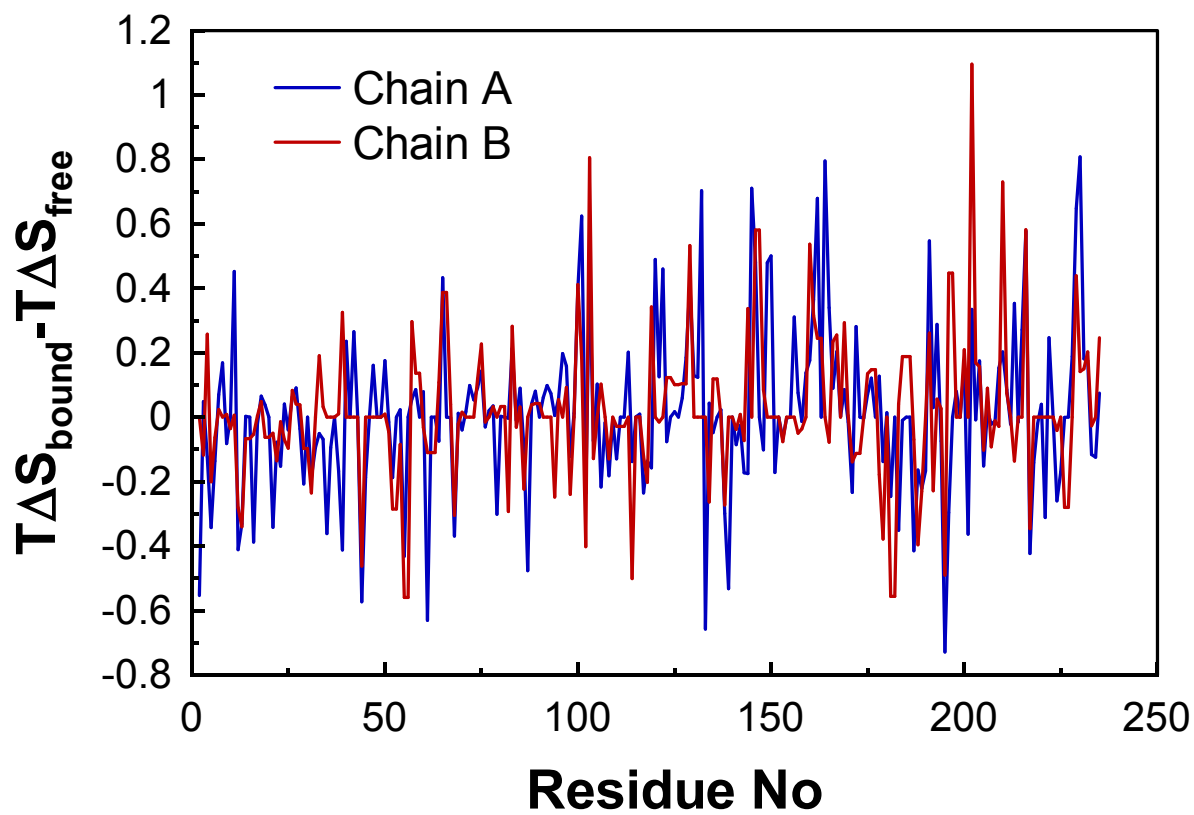

Figure S3: Root mean square fluctuations of residues (considering all non-hydrogen atoms) of the two subunits of  $\lambda$ -CI in the O<sub>L</sub>1 bound state (simulation corresponding to parm94 force field).

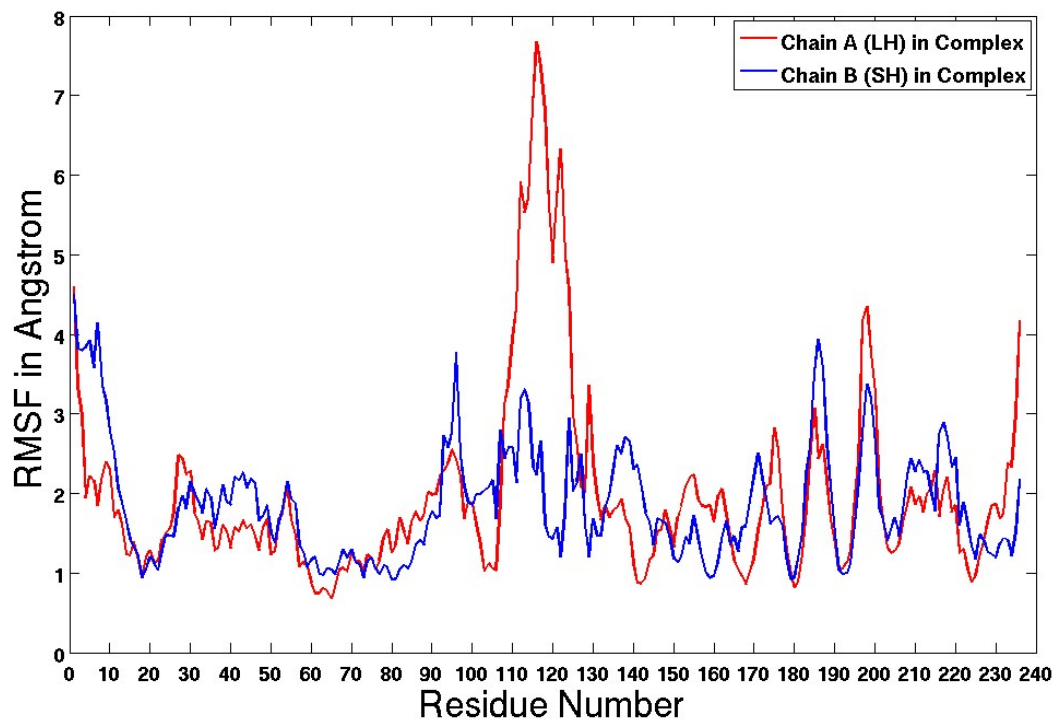

Figure S4: Contribution of Entropy in free energy (TS) of protein residues of the two subunits of  $\lambda$ -CI in the O<sub>L</sub>1 bound state and dimeric state. (simulation corresponding to parm94 force field)

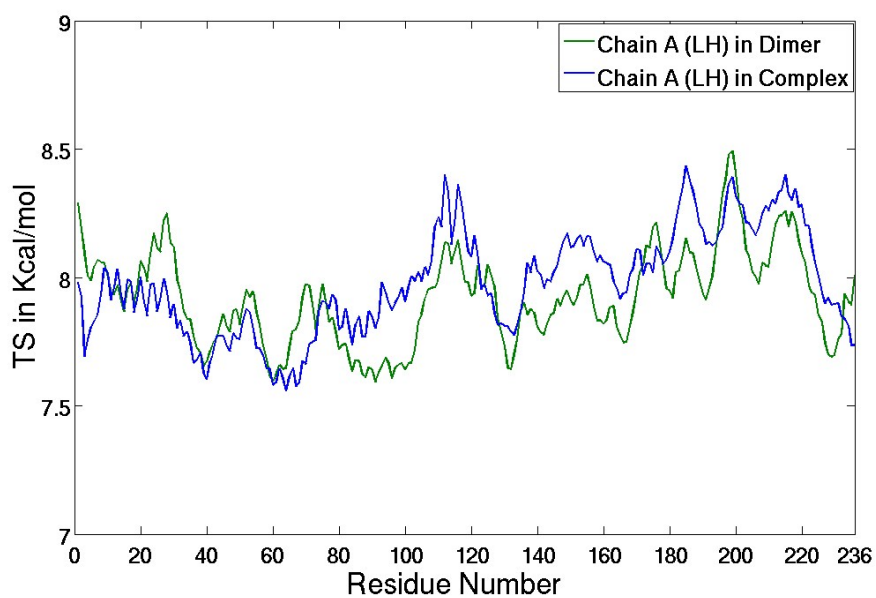

(a)

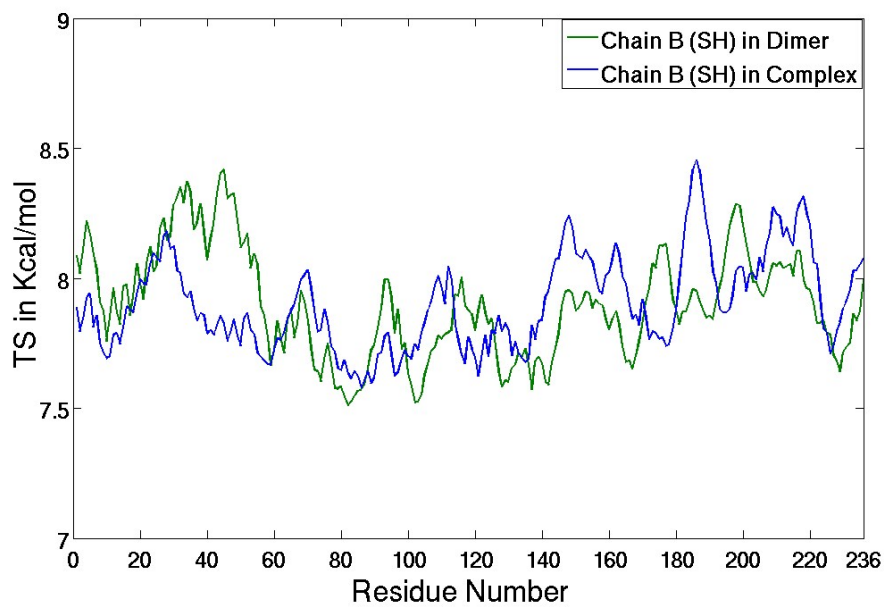

(b)

Figure S5: Ratio of RMSF of  $C\alpha$  atoms and considering side chain atoms of individual subunits of  $\lambda$ -CI in absence and presence of operator DNA for both the chains of  $\lambda$ -CI dimer in operator bound and unbound states were measured (simulation corresponding to parm94 force field).

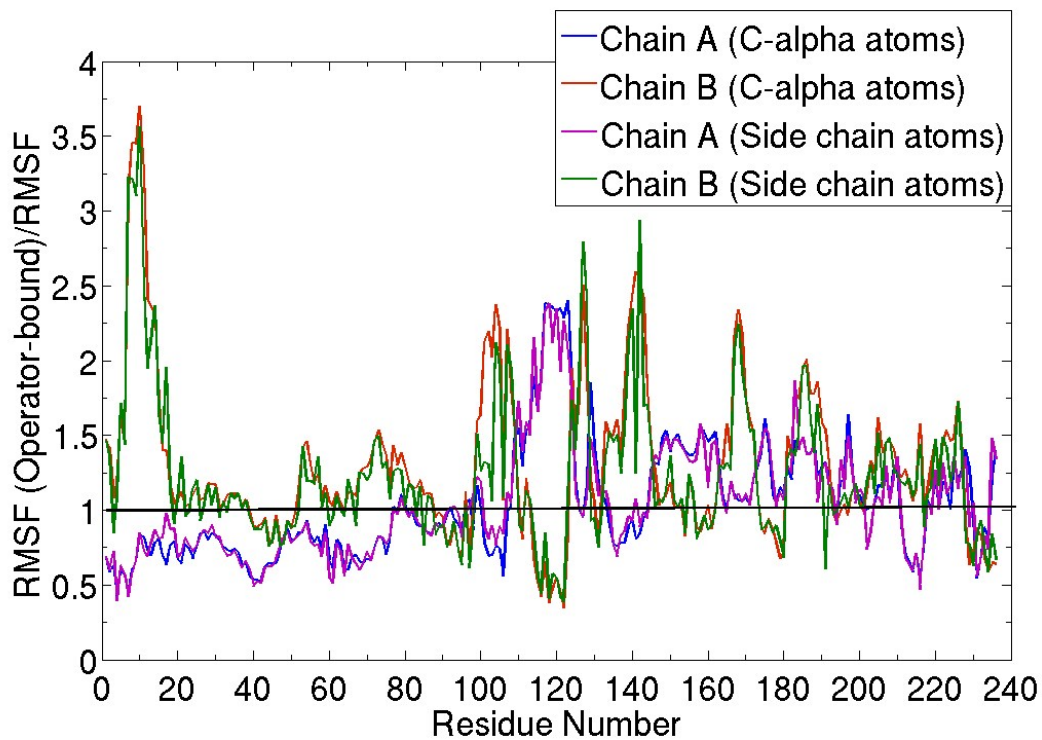

Figure S6: A schematic diagram of alternate geometric arrangements that can lead to protein-protein interaction between two DNA dimers and concomitant DNA loop formation when one protein (in this case,  $\lambda$ -CI) is bound to the same non-target site. The light colored ovals indicate same protein capable of forming different loops.

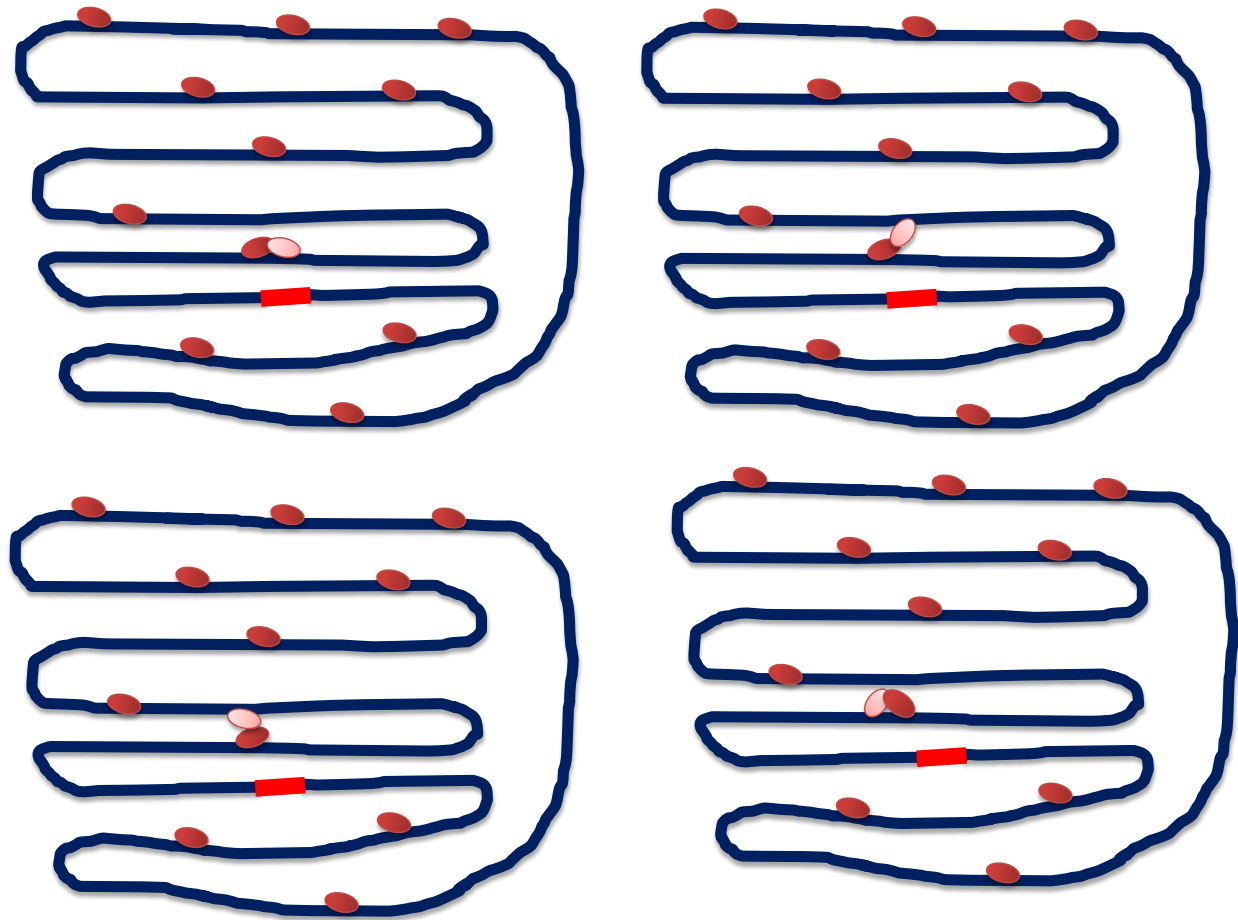

Table S1

| <b>Oligo</b> | <b>Sequence</b>            |
|--------------|----------------------------|
| OR1F         | 5'-CGTACCTCTGGCGGTGATAG-3' |
| OR1R         | 5'-CTATCACCGCCAGAGGTACG-3' |
| OR2F         | 5'-GCAACACCGTGCGTGTTGTC-3' |
| OR2R         | 5'-GACAACACGCACGGTGTTGC-3' |



Table S2

Fit of time-resolved fluorescence decay of acrylodan labeled proteins to tri-exponential function

| <b>Acrylodan<br/>labeled<br/>proteins</b> | <b><math>\tau_1</math>(ns)</b> | <b><math>\tau_2</math> (ns)</b> | <b><math>\tau_3</math> (ns)</b> | <b><math>\tau_{avg}</math></b> |
|-------------------------------------------|--------------------------------|---------------------------------|---------------------------------|--------------------------------|
| <b>GC186</b>                              | 0.22±0.03 (23%)                | 0.84±0.07(56%)                  | 3.37±0.3 (21%)                  | 2.27±0.13                      |
| <b>GC186-O<sub>R</sub>1</b>               | 0.18±0.03 (22%)                | 0.79±0.06 (58%)                 | 3.32±0.2 (20%)                  | 2.20±0.12                      |
| <b>GC186-O<sub>R</sub>2</b>               | 0.24±0.05 (24%)                | 0.78±0.06 (60%)                 | 3.37±0.2 (16%)                  | 2.06±0.14                      |

**Table S3**

Fit of anisotropy decays to bi-exponential functions

| <b>Acrylodan labeled proteins</b> | <b><math>\tau_{\text{fast}}</math> (ns)</b> | <b><math>\tau_{\text{slow}}</math> (ns)</b> | <b><math>\theta</math> (degree)</b> |
|-----------------------------------|---------------------------------------------|---------------------------------------------|-------------------------------------|
| <b>GC186CI</b>                    | 0.17±0.02 (15%)                             | 52±2.7 (85%)                                | 18.7±0.3                            |
| <b>GC186CI-O<sub>R</sub>1</b>     | 0.12±0.01 (21%)                             | 41±1.5 (79%)                                | 22.5±0.2                            |
| <b>GC186CI-O<sub>R</sub>2</b>     | 0.10±0.03 (11%)                             | 53±2.4 (89%)                                | 15.9±0.2                            |
